# Supplementary material for: The electronic temperature and the effective chemical potential parameters of an atom in a molecule. A Fermi–Dirac semi-local variational approach
Source: Royal Society of Chemistry journal article supplement (doi:10.1039/d1cp04071e), 2021-12-08
Supplement: d1cp04071e1.pdf [file d1cp04071e1.pdf]

The electronic temperature and the effective chemical potential parameters of an atom in a molecule. A Fermi-Dirac semi-local variational approach.

## ELECTRONIC SUPPLEMENTARY INFORMATION

### INDEX

- 1.0 Table S1.** Atom-condensed Fukui functions ( $f^+$ ,  $f^-$  and  $f^0$ ) and dual descriptor ( $\Delta f$ ) values for atoms belonging to several molecular species. Atomic charges were obtained from the Hirshfeld partition scheme using molecular densities calculated at the  $\omega$ -B97XD/6-311++G(d,p) level of theory. **S1**
- 2.0 Table S2.** Computed values for the chemical potential ( $\mu_\Omega$ ) and electronic temperature ( $\theta_\Omega$ ) for the most acidic proton in acids (protonates species) and the most susceptible atomic donor in the corresponding conjugated bases. The absolute value of the logarithm of the Orbital Accepting Descriptor ( $\text{Log}[\text{OAD}_{\text{B,LUMO}}]$ ) was obtained for the LUMO of acids at the highest acidity condition ( $\mu_{\text{H}}$ ,  $\theta_{\text{H}}$ ) while the logarithm of the Orbital Donating Descriptor ( $\text{Log}[\text{ODD}_{\text{B,HOMO}}]$ ) was calculated for the HOMO of conjugated bases at the highest basicity condition ( $\mu_{\text{B}}$ ,  $\theta_{\text{B}}$ ). **S2**
- 3.0 Table S3.** Computed chemical potential ( $\mu_\Omega$ ) and inverse of electronic temperature ( $\theta_\Omega^{-1}$ ) values for heteroatoms constituting a set of selected ethenes involved in a Markovnikov addition. **S3**
- 4.0 Table S4.** Logarithm of the Orbital Donating Descriptor of the Carbon atom involved in the Markovnikov addition reaction ( $\text{Log}[\text{ODD}_{\text{C1,HOMO}}]$ ) and their corresponding activation energies  $E_{\text{act}}$ . **S4**
- 5.0** Cartesian coordinates of ascorbic acid conjugated bases. **S5**
- 6.0** Cartesian coordinates of citric acid conjugated bases. **S7**

**Table S1.** Atom-condensed Fukui functions ( $f^+$ ,  $f^-$  and  $f^0$ ) and dual descriptor ( $\Delta f$ ) values for atoms belonging to several molecular species. Atomic charges were obtained from the Hirshfeld partition scheme using molecular densities calculated at the  $\omega$ -B97XD/6-311++G(d,p) level of theory.

|                                   | $f^-$ | $f^+$ | $f^0$ | $\Delta f$ |                                   | $f^-$ | $f^+$ | $f^0$ | $\Delta f$ |
|-----------------------------------|-------|-------|-------|------------|-----------------------------------|-------|-------|-------|------------|
| <b>HCl</b>                        |       |       |       |            | <b>LiH</b>                        |       |       |       |            |
| Cl                                | 0.87  | 0.31  | 0.59  | -0.56      | Li                                | 0.44  | 0.84  | 0.64  | 0.40       |
| H                                 | 0.13  | 0.67  | 0.40  | 0.54       | H                                 | 0.56  | 0.04  | 0.30  | -0.52      |
| <b>H<sub>2</sub>O</b>             |       |       |       |            | <b>H<sub>2</sub>S</b>             |       |       |       |            |
| O                                 | 0.65  | 0.10  | 0.37  | -0.55      | S                                 | 0.78  | 0.63  | 0.71  | -0.15      |
| H                                 | 0.17  | 0.45  | 0.31  | 0.28       | H                                 | 0.11  | 0.18  | 0.15  | 0.07       |
| <b>C<sub>2</sub>H<sub>6</sub></b> |       |       |       |            | <b>AlH<sub>3</sub></b>            |       |       |       |            |
| C                                 | 0.14  | 0.05  | 0.10  | -0.09      | Al                                | 0.38  | 0.80  | 0.59  | 0.42       |
| H                                 | 0.07  | 0.15  | 0.22  | 0.08       | H                                 | 0.08  | 0.07  | 0.07  | -0.01      |
| H                                 | 0.14  | 0.15  | 0.15  | 0.01       | H                                 | 0.27  | 0.07  | 0.17  | -0.20      |
| <b>NH<sub>3</sub></b>             |       |       |       |            | <b>C<sub>2</sub>H<sub>4</sub></b> |       |       |       |            |
| N                                 | 0.54  | 0.12  | 0.33  | -0.42      | C                                 | 0.31  | 0.24  | 0.28  | -0.07      |
| H                                 | 0.15  | 0.29  | 0.22  | 0.14       | H                                 | 0.09  | 0.13  | 0.11  | 0.04       |
| <b>CH<sub>2</sub></b>             |       |       |       |            | <b>CO</b>                         |       |       |       |            |
| C                                 | 0.40  | 0.12  | 0.26  | -0.28      | C                                 | 0.70  | 0.79  | 0.75  | 0.09       |
| H                                 | 0.10  | 0.36  | 0.23  | 0.26       | O                                 | 0.30  | 0.21  | 0.26  | -0.09      |

**Table S2.** Computed values for the chemical potential ( $\mu_\Omega$ ) and electronic temperature ( $\theta_\Omega$ ) for the most acidic proton in acids (protonates species) and the most susceptible atomic donor in the corresponding conjugated bases. The absolute value of the logarithm of the Orbital Accepting Descriptor ( $\text{Log}[\text{OAD}_{\text{B,LUMO}}]$ ) was obtained for the LUMO of acids at the highest acidity condition ( $\mu_{\text{H}}, \theta_{\text{H}}$ ) while the logarithm of the Orbital Donating Descriptor ( $\text{Log}[\text{ODD}_{\text{B,HOMO}}]$ ) was calculated for the HOMO of conjugated bases at the highest basicity condition ( $\mu_{\text{B}}, \theta_{\text{B}}$ ).

|                       | Protonated species |                                          |                     | Conjugated base  |                                          |                     | $pK_a$ |
|-----------------------|--------------------|------------------------------------------|---------------------|------------------|------------------------------------------|---------------------|--------|
|                       | $\mu_{\text{H}}$   | $\text{Log}[\text{OAD}_{\text{H,LUMO}}]$ | $\theta_{\text{H}}$ | $\mu_{\text{B}}$ | $\text{Log}[\text{ODD}_{\text{B,HOMO}}]$ | $\theta_{\text{B}}$ |        |
| <b>INORGANIC</b>      |                    |                                          |                     |                  |                                          |                     |        |
| Perchloric acid       | -1032.11           | 3.012                                    | 0.006               | -259.94          | 1.352                                    | 0.012               | -8.00  |
| Hydrochloric acid     | -1693.50           | 3.219                                    | 0.003               | -216.42          | 1.269                                    | 0.015               | -6.30  |
| Sulfuric acid         | -873.58            | 2.940                                    | 0.007               | -264.89          | 1.455                                    | 0.011               | -3.00  |
| Chloric acid          | -1126.87           | 3.050                                    | 0.006               | -41.34           | 0.629                                    | 0.074               | -1.00  |
| Sulfurous acid        | -949.49            | 2.976                                    | 0.007               | -219.08          | 1.362                                    | 0.014               | 1.81   |
| Phosphoric acid       | -714.56            | 2.853                                    | 0.009               | -178.30          | 1.167                                    | 0.018               | 2.12   |
| Nitrous acid          | -189.31            | 2.274                                    | 0.031               | -33.70           | 0.680                                    | 0.081               | 3.39   |
| Hydrazoic acid        | -132.58            | 2.118                                    | 0.041               | -28.22           | 0.503                                    | 0.104               | 4.72   |
| Boric acid            | -178.62            | 2.250                                    | 0.035               | -38.33           | 0.594                                    | 0.080               | 6.23   |
| Hydrocyanic acid      | -96.43             | 1.976                                    | 0.050               | -14.72           | 0.519                                    | 0.152               | 9.21   |
| <b>ORGANIC</b>        |                    |                                          |                     |                  |                                          |                     |        |
| p-Toluensulfonic acid | -625.40            | 2.796                                    | 0.012               | -197.56          | 0.838                                    | 0.021               | -2.80  |
| Citric acid           | -190.11            | 2.278                                    | 0.039               | -53.22           | 0.161                                    | 0.082               | 2.79   |
| Formic acid           | -168.01            | 2.223                                    | 0.035               | -30.62           | 0.630                                    | 0.089               | 3.76   |
| Lactic acid           | -159.02            | 2.200                                    | 0.043               | -39.69           | 0.354                                    | 0.092               | 3.75   |
| Ascorbic acid         | -181.94            | 2.259                                    | 0.040               | -50.80           | 0.172                                    | 0.085               | 4.20   |
| Benzoic acid          | -135.21            | 2.130                                    | 0.052               | -35.73           | 0.140                                    | 0.112               | 4.19   |
| Acetic acid           | -149.35            | 2.172                                    | 0.042               | -32.41           | 0.463                                    | 0.098               | 4.80   |
| Propionic acid        | -138.97            | 2.142                                    | 0.047               | -33.37           | 0.344                                    | 0.104               | 4.87   |
| Carbonic acid         | -188.85            | 2.274                                    | 0.330               | -39.09           | 0.613                                    | 0.077               | 6.32   |
| Phenol acid           | -114.06            | 2.056                                    | 0.059               | -28.29           | 0.125                                    | 0.135               | 9.80   |

**Table S3.** Chemical potential ( $\mu_{\Omega}$ ) and inverse of electronic temperature ( $\theta_{\Omega}^{-1}$ ) values for heteroatoms constituting a set of selected ethenes involved in a Markovnikov addition.

| Substituent (R <sub>1</sub> )   | atom           | $\theta_{\Omega}^{-1}$ | $\mu_{\Omega}$ | Substituent (R <sub>1</sub> ) | atom              | $\theta_{\Omega}^{-1}$ | $\mu_{\Omega}$ |
|---------------------------------|----------------|------------------------|----------------|-------------------------------|-------------------|------------------------|----------------|
| H                               | C <sub>1</sub> | 4.42                   | -14.42         | F                             | C <sub>1</sub>    | 13.40                  | -45.04         |
|                                 | C <sub>2</sub> | 4.42                   | -14.42         |                               | C <sub>2</sub>    | 13.15                  | -45.40         |
| CH <sub>2</sub> CH <sub>3</sub> | C <sub>1</sub> | 5.18                   | -20.72         |                               | F <sub>3</sub>    | 7.07                   | -20.84         |
|                                 | C <sub>2</sub> | 5.16                   | -20.71         | NHOH                          | C <sub>1</sub>    | 9.70                   | -36.34         |
|                                 | C <sub>3</sub> | 5.14                   | -20.73         |                               | C <sub>2</sub>    | 9.49                   | -36.39         |
|                                 | C <sub>4</sub> | 5.15                   | -20.73         |                               | N <sub>3</sub>    | 8.67                   | -30.71         |
| CHCH <sub>2</sub>               | C <sub>1</sub> | 5.35                   | -20.92         |                               | O <sub>4</sub>    | 7.52                   | -25.94         |
|                                 | C <sub>2</sub> | 5.34                   | -20.92         | OCH <sub>3</sub>              | C <sub>1</sub>    | 8.67                   | -33.01         |
|                                 | C <sub>3</sub> | 5.35                   | -20.92         |                               | C <sub>2</sub>    | 8.46                   | -33.16         |
|                                 | C <sub>4</sub> | 5.34                   | -20.92         |                               | O <sub>3</sub>    | 6.52                   | -22.52         |
| CCH                             | C <sub>1</sub> | 5.56                   | -21.18         |                               | C <sub>4</sub>    | 8.46                   | -33.18         |
|                                 | C <sub>2</sub> | 5.54                   | -21.18         | NHNH <sub>2</sub>             | C <sub>1</sub>    | 7.56                   | -29.00         |
|                                 | C <sub>3</sub> | 5.61                   | -21.14         |                               | C <sub>2</sub>    | 7.38                   | -29.03         |
|                                 | C <sub>4</sub> | 5.59                   | -21.17         |                               | N <sub>3</sub>    | 6.83                   | -24.67         |
| CH <sub>3</sub>                 | C <sub>1</sub> | 4.95                   | -18.31         |                               | N <sub>4</sub>    | 6.81                   | -24.72         |
|                                 | C <sub>2</sub> | 4.94                   | -18.32         | OH                            | C <sub>1</sub>    | 9.20                   | -31.86         |
|                                 | C <sub>3</sub> | 4.93                   | -18.33         |                               | C <sub>2</sub>    | 8.99                   | -32.19         |
| CHO                             | C <sub>1</sub> | 9.04                   | -33.42         |                               | O <sub>3</sub>    | 6.47                   | -19.99         |
|                                 | C <sub>2</sub> | 9.04                   | -33.41         | NH <sub>2</sub>               | C <sub>1</sub>    | 6.49                   | -23.24         |
|                                 | C <sub>3</sub> | 8.56                   | -33.71         |                               | C <sub>2</sub>    | 6.34                   | -23.37         |
|                                 | O <sub>4</sub> | 6.77                   | -22.67         |                               | N <sub>3</sub>    | 5.72                   | -18.84         |
| COOH                            | C <sub>1</sub> | 11.15                  | -43.11         | NHCH <sub>3</sub>             | C <sub>1</sub>    | 6.43                   | -25.07         |
|                                 | C <sub>2</sub> | 11.14                  | -43.09         |                               | C <sub>2</sub>    | 6.26                   | -25.12         |
|                                 | C <sub>3</sub> | 10.10                  | -42.91         |                               | N <sub>3</sub>    | 5.83                   | -21.13         |
|                                 | O <sub>4</sub> | 9.08                   | -31.73         |                               | C <sub>4</sub>    | 6.27                   | -25.13         |
|                                 | O <sub>5</sub> | 9.07                   | -31.75         |                               | COCH <sub>3</sub> | C <sub>1</sub>         | 8.60           |
| COF                             | C <sub>1</sub> | 14.05                  | -53.30         | C <sub>2</sub>                |                   | 8.60                   | -34.18         |
|                                 | C <sub>2</sub> | 14.04                  | -53.28         | C <sub>3</sub>                |                   | 8.13                   | -34.32         |
|                                 | C <sub>3</sub> | 12.79                  | -53.17         | C <sub>4</sub>                |                   | 8.60                   | -34.20         |
|                                 | O <sub>4</sub> | 11.41                  | -38.90         | O <sub>5</sub>                |                   | 6.69                   | -24.33         |
|                                 | F <sub>5</sub> | 9.75                   | -33.35         |                               |                   |                        |                |

**Table S4.** Logarithm of the Orbital Donating Descriptor of the Carbon atom involved in the Markovnikov addition reaction ( $\text{Log}[\text{ODD}_{\text{C1,HOMO}}]$ ) and their corresponding activation energies  $E_{act}$ .

| Species | $\text{Log}[\text{ODD}_{\text{C1,HOMO}}]$ | $E_{act}$<br>(kcal/mol) | Species | $\text{Log}[\text{ODD}_{\text{C1,HOMO}}]$ | $E_{act}$<br>(kcal/mol) |
|---------|-------------------------------------------|-------------------------|---------|-------------------------------------------|-------------------------|
| CH3     | 0.043                                     | 30.1                    | F       | 0.56                                      | 32.4                    |
| COF     | 0.443                                     | 44.8                    | NHOH    | 0.30                                      | 10.8                    |
| CH2CH3  | -0.037                                    | 28.6                    | NHNH2   | 0.17                                      | 1.0                     |
| CHCH2   | 0.005                                     | 29.0                    | OCH3    | 0.23                                      | 13.6                    |
| H       | 0.138                                     | 36.1                    | OH      | 0.37                                      | 18.3                    |
| CCH     | 0.053                                     | 33.5                    | NH2     | 0.19                                      | 6.0                     |
| CHO     | 0.289                                     | 38.4                    | NHCH3   | 0.08                                      | 0.6                     |
| COOH    | 0.322                                     | 41.6                    |         |                                           |                         |
| COCH3   | 0.176                                     | 37.7                    |         |                                           |                         |

# Cartesian coordinates of ascorbic acid conjugated bases

**Ascorbic anion H1**

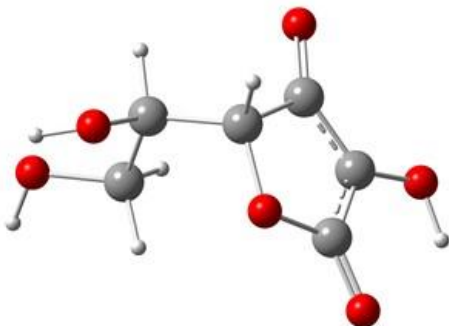

O, -0.335478, -1.135984, -0.827265  
C, -1.516748, -1.015406, -0.124437  
C, -1.77905, 0.341393, 0.166768  
C, -0.779136, 1.162551, -0.333151  
C, 0.201865, 0.175982, -1.004377  
O, -2.179065, -2.004303, 0.169799  
O, -2.909143, 0.703019, 0.871291  
O, -0.565028, 2.386911, -0.307319  
C, 1.595898, 0.299697, -0.416113  
C, 1.642886, -0.162444, 1.029507  
H, 0.262522, 0.378511, -2.078061  
H, -3.366681, -0.127913, 1.035588  
H, 1.282741, -1.194306, 1.089625  
O, 2.520338, -0.441337, -1.201503  
H, 3.315824, -0.510988, -0.66744  
H, 1.846258, 1.368609, -0.450609  
O, 3.012, -0.084786, 1.453337  
H, 3.106238, -0.599375, 2.253111  
H, 1.009809, 0.486664, 1.641879

**Ascorbic anion H2**

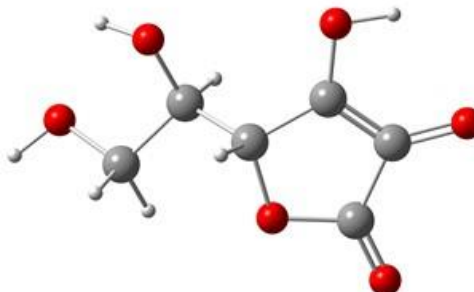

O, 0.284949, -1.186005, 0.531885  
C, 1.592609, -1.22534, 0.061056  
C, 2.068339, 0.171893, -0.180262  
C, 1.002636, 0.951821, 0.155253  
C, -0.16627, 0.169898, 0.622924  
O, 2.133203, -2.291311, -0.074766  
O, 3.214759, 0.534518, -0.593705  
O, 1.0326, 2.317426, 0.11548  
C, -1.458111, 0.289762, -0.195869  
C, -2.402494, -0.869073, 0.083824  
H, -0.428406, 0.372406, 1.672726  
H, 1.932187, 2.49782, -0.194029  
H, -2.586857, -0.932162, 1.164528  
O, -2.083985, 1.510723, 0.15386  
H, -2.961715, 1.478406, -0.233919  
H, -1.196791, 0.28487, -1.263221  
O, -3.623789, -0.586103, -0.610392  
H, -4.282093, -1.225073, -0.342297  
H, -1.958481, -1.804014, -0.264252

**Ascorbic anion H3**

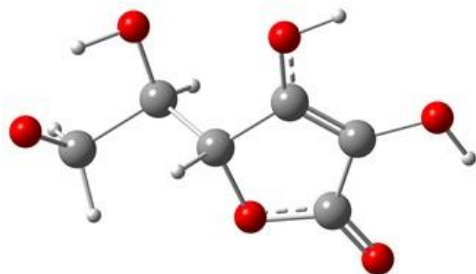

O, -0.349897, -1.332073, -0.328749  
C, -1.637644, -1.105557, -0.040679  
C, -1.862317, 0.325213, 0.009133  
C, -0.708398, 0.949499, -0.256663  
C, 0.370859, -0.0755, -0.421481  
O, -2.473016, -1.969887, 0.128033  
O, -3.090359, 0.865044, 0.247392  
O, -0.478012, 2.259348, -0.386536  
C, 1.488809, -0.05084, 0.642679  
C, 2.64717, -1.021307, 0.209178  
H, 0.847395, -0.02651, -1.405617  
H, -3.686402, 0.118783, 0.376217  
H, -1.292832, 2.727833, -0.187199  
H, 2.190609, -1.934815, -0.230005  
O, 2.066416, 1.215556, 0.676314  
H, 2.866851, 1.001163, 0.083397  
H, 1.037239, -0.310908, 1.610969  
O, 3.463522, -0.331935, -0.619022  
H, 3.13703, -1.35301, 1.159778

**Ascorbic anion H4**

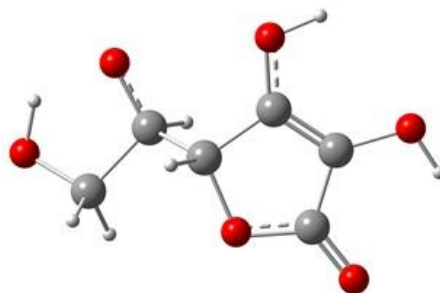

O, 0.317635, -1.237567, 0.54869  
C, 1.56552, -1.156809, 0.071478  
C, 1.906003, 0.23866, -0.112478  
C, 0.859409, 0.989829, 0.253993  
C, -0.27516, 0.090446, 0.626603  
O, 2.288555, -2.10878, -0.145905  
O, 3.130759, 0.639059, -0.558952  
O, 0.762264, 2.320988, 0.296713  
C, -1.518509, 0.20199, -0.305968  
C, -2.499384, -0.973289, 0.029789  
H, -0.607345, 0.246551, 1.656197  
H, 3.625847, -0.170309, -0.727497  
H, 1.567347, 2.690624, -0.07537  
H, -2.486801, -1.164746, 1.118684  
O, -2.142457, 1.372437, -0.159561  
H, -1.118152, 0.012708, -1.338873  
O, -3.775955, -0.547327, -0.376925  
H, -3.62356, 0.43261, -0.36198  
H, -2.231013, -1.902879, -0.484138

## Cartesian coordinates of citric acid conjugated bases

**Citric anion H1**

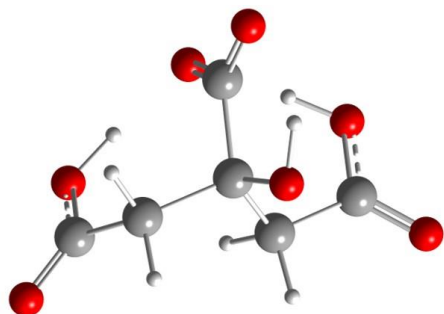

O, 0.048454, -0.786982, 1.205219  
O, 1.000767, 1.779642, 0.775559  
O, -0.803355, 2.065342, -0.478695  
O, 3.589555, -0.192864, -0.835535  
O, -3.052941, 0.671773, 0.093228  
O, 2.574298, -0.935021, 1.031429  
O, -3.292564, -1.519214, 0.197847  
C, 0.001377, -0.222792, -0.065797  
C, 1.243516, -0.597735, -0.917244  
C, -1.260598, -0.722674, -0.798712  
C, -0.00002, 1.311908, 0.047491  
C, 2.612671, -0.548331, -0.170888  
C, -2.608736, -0.577887, -0.104113  
H, 1.109192, -1.635709, -1.240413  
H, 1.295967, 0.024113, -1.814977  
H, -1.122782, -1.791341, -0.954885  
H, -1.324731, -0.234969, -1.777652  
H, 1.033509, -0.926857, 1.379425  
H, 0.943648, 2.741633, 0.760732  
H, -2.37778, 1.306798, -0.209075

**Citric anion H2, H3**

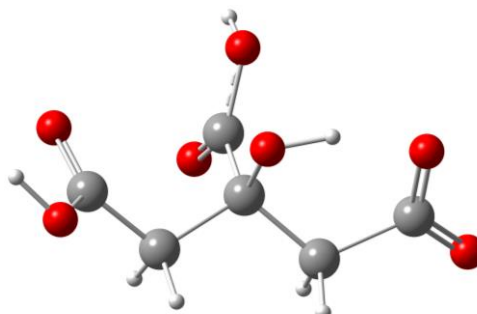

O, -0.056371, -0.765618, 1.161316  
O, 0.146451, 1.866623, 1.099014  
O, -0.022291, 1.992967, -1.118668  
O, 3.665805, -0.451446, -0.677039  
O, -3.22563, -1.484726, 0.085775  
O, 2.487744, -0.606846, 1.232694  
O, -2.869017, 0.713114, 0.183344  
C, 0.025692, -0.22019, -0.115829  
C, 1.30462, -0.68762, -0.847295  
C, -1.216619, -0.678925, -0.901665  
C, 0.034295, 1.322931, -0.114323  
C, 2.62298, -0.552116, -0.02344  
C, -2.48911, -0.377129, -0.157725  
H, 1.185635, -1.756304, -1.06056  
H, 1.416824, -0.163589, -1.797513  
H, -1.138465, -1.752376, -1.070348  
H, -1.250999, -0.15586, -1.860603  
H, 0.896153, -0.758254, 1.474898  
H, 0.178777, 2.819007, 0.955933  
H, -3.992598, -1.186881, 0.588359
